# Supplementary material for: Enhanced anti-tumor activity of the glycoengineered type II CD20 antibody obinutuzumab (GA101) in combination with chemotherapy in xenograft models of human lymphoma
Source: PubMed Central journal article supplement — Leuk Lymphoma. 2013 Feb 4;55(9):2151–60. doi: 10.3109/10428194.2013.856008 (PMC4196549; doi:10.3109/10428194.2013.856008), 2013-02-04
Supplement: LAL-55-2151-s1.pdf [file LAL-55-2151-s1.pdf]

Supplementary material for Herting F, et al. Enhanced anti-tumor activity of the glycoengineered type II CD20 antibody obinutuzumab (GA101) in combination with chemotherapy in xenograft models of human lymphoma. *Leuk Lymphoma* 2014; 55:2151–2160.

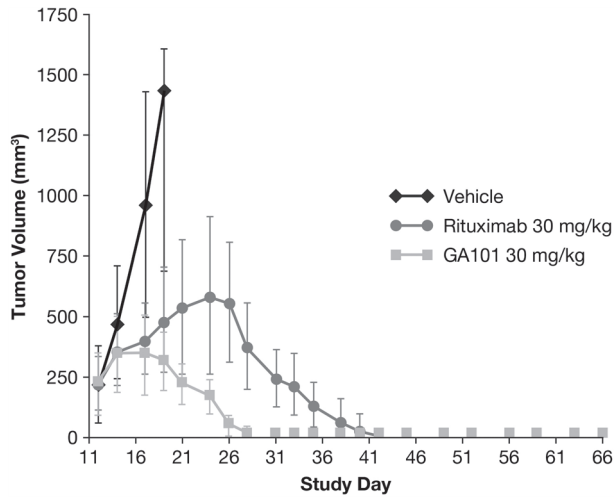

Supplementary Figure 1. Tumor size during treatment with rituximab or obinutuzumab (GA101) (30 mg/kg i.p. x3) in single-agent Z138 when tumor load reached a volume of 220 mm<sup>3</sup>.

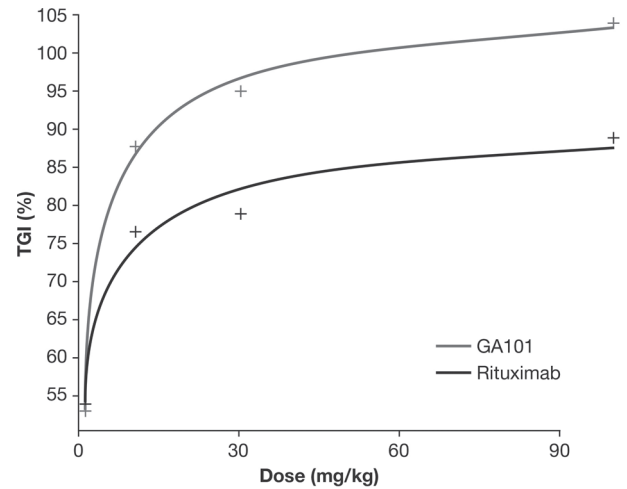

Supplementary Figure 3. Tumour growth inhibition (%) at Day 31 following treatment with obinutuzumab (GA101) and rituximab at various dose concentrations. TGI, tumor growth inhibition.

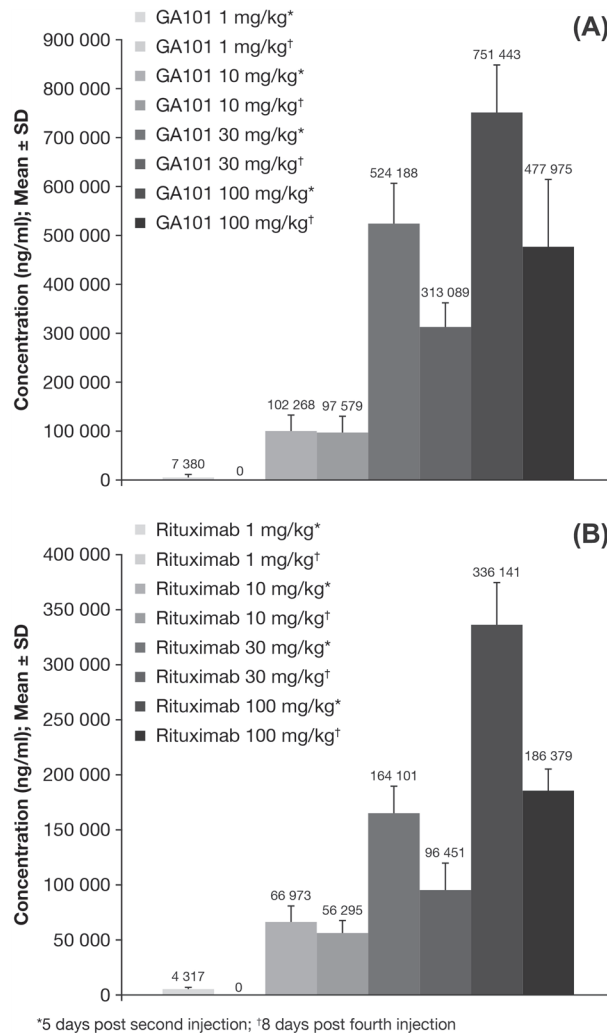

Supplementary Figure 2. Serum levels of (A) anti-CD20 antibody obinutuzumab (GA101) and (B) rituximab at various dose concentrations. SD, standard deviation.

Supplementary Table I. Treatment schedules by chemotherapy combination partner.

|                                                                                                                                      | n  | Treatment schedule                                                                             | Median tumor volume at staging (mm <sup>3</sup> ) |
|--------------------------------------------------------------------------------------------------------------------------------------|----|------------------------------------------------------------------------------------------------|---------------------------------------------------|
| Single-agent studies in Z138 xenograft                                                                                               |    |                                                                                                |                                                   |
| Single-agent obinutuzumab (GA101) or rituximab                                                                                       |    |                                                                                                |                                                   |
| Z138 (mantle cell lymphoma) tumor xenograft<br>Treatment initiation 14 days post cell transplantation<br>Study termination Day 35-78 | 10 | Vehicle                                                                                        | 214                                               |
|                                                                                                                                      | 10 | Rituximab 10 mg/kg i.v. q7d × 4                                                                | 207                                               |
|                                                                                                                                      | 10 | Obinutuzumab (GA101) 10 mg/kg i.v. q7d × 4                                                     | 211                                               |
| Single-agent obinutuzumab (GA101) or rituximab                                                                                       |    |                                                                                                |                                                   |
| Z138 (mantle cell lymphoma) tumor xenograft<br>Treatment initiation 12 days post cell transplantation<br>Study termination Day 21-66 | 10 | Vehicle                                                                                        | -                                                 |
|                                                                                                                                      | 10 | Rituximab 30 mg/kg i.p. × 3                                                                    | -                                                 |
|                                                                                                                                      | 10 | Obinutuzumab (GA101) 30 mg/kg i.p. × 3                                                         | -                                                 |
| Single-agent obinutuzumab (GA101) or rituximab                                                                                       |    |                                                                                                |                                                   |
| Z138 (mantle cell lymphoma) tumor xenograft<br>Treatment initiation 20 days post cell transplantation<br>Study termination Day 49    | 10 | Vehicle                                                                                        | 397                                               |
|                                                                                                                                      | 10 | Rituximab 1 mg/kg i.v. q7d × 4                                                                 | 396                                               |
|                                                                                                                                      | 10 | Rituximab 10 mg/kg i.v. q7d × 4                                                                | 396                                               |
|                                                                                                                                      | 10 | Rituximab 30 mg/kg i.v. q7d × 4                                                                | 401                                               |
|                                                                                                                                      | 10 | Rituximab 100 mg/kg i.v. q7d × 4                                                               | 406                                               |
|                                                                                                                                      | 10 | Obinutuzumab (GA101) 1 mg/kg i.v. q7d × 4                                                      | 402                                               |
|                                                                                                                                      | 10 | Obinutuzumab (GA101) 10 mg/kg i.v. q7d × 4                                                     | 394                                               |
|                                                                                                                                      | 10 | Obinutuzumab (GA101) 30 mg/kg i.v. q7d × 4                                                     | 410                                               |
|                                                                                                                                      | 10 | Obinutuzumab (GA101) 100 mg/kg i.v. q7d × 4                                                    | 393                                               |
| Single-agent obinutuzumab (GA101)                                                                                                    |    |                                                                                                |                                                   |
| Z138 (mantle cell lymphoma) tumor xenograft<br>Treatment initiation 14 days post cell transplantation<br>Study termination Day 40    | 10 | Vehicle                                                                                        | 201                                               |
|                                                                                                                                      | 10 | Obinutuzumab (GA101) 10 mg/kg i.v. q7d × 4                                                     | 203                                               |
|                                                                                                                                      | 10 | Obinutuzumab (GA101) WT 10 mg/kg i.v. q7d × 4                                                  | 202                                               |
| Combination studies in Z138 xenograft                                                                                                |    |                                                                                                |                                                   |
| Bendamustine combination                                                                                                             |    |                                                                                                |                                                   |
| Z138 (mantle cell lymphoma) tumor xenograft<br>Treatment initiation 19 days post cell transplantation<br>Study termination Day 33    | 10 | Vehicle                                                                                        | 442                                               |
|                                                                                                                                      | 10 | Obinutuzumab (GA101) 1 mg/kg i.p., Days 19, 26                                                 | 433                                               |
|                                                                                                                                      | 10 | Rituximab 1 mg/kg i.p., Days 19, 26                                                            | 455                                               |
|                                                                                                                                      | 10 | Bendamustine 3 mg/kg i.p., Days 19, 20, 21, 22                                                 | 443                                               |
|                                                                                                                                      | 10 | Obinutuzumab (GA101) 1 mg/kg i.p. Days 19, 26 + bendamustine 3 mg/kg i.p., Days 19, 20, 21, 22 | 446                                               |
|                                                                                                                                      | 10 | Rituximab 1 mg/kg i.p., Days 19, 26 + bendamustine 3 mg/kg i.p., Days 19, 20, 21, 22           | 431                                               |
| Fludarabine combination                                                                                                              |    |                                                                                                |                                                   |
| Z138 (mantle cell lymphoma) tumor xenograft<br>Treatment initiation 22 days post cell transplantation<br>Study termination Day 43    | 10 | Vehicle                                                                                        | 399                                               |
|                                                                                                                                      | 10 | Obinutuzumab (GA101) 1 mg/kg i.v., Days 22, 29                                                 | 411                                               |
|                                                                                                                                      | 10 | Rituximab 1 mg/kg i.v., Days 22, 29                                                            | 406                                               |
|                                                                                                                                      | 10 | Fludarabine 40 mg/kg i.p., Days 22, 23, 24                                                     | 408                                               |
|                                                                                                                                      | 10 | Obinutuzumab (GA101) 1 mg/kg i.v., Days 22, 29 + fludarabine 40 mg/kg i.p., Days 22, 23, 24    | 403                                               |
|                                                                                                                                      | 10 | Rituximab 1 mg/kg i.v., Days 22, 29 + fludarabine 40 mg/kg i.p., Days 22, 23, 24               | 416                                               |
| Chlorambucil combination                                                                                                             |    |                                                                                                |                                                   |
| Z138 (mantle cell lymphoma) tumor xenograft<br>Treatment initiation 27 days post cell transplantation<br>Study termination Day 41    | 10 | Vehicle                                                                                        | 272                                               |

(Continued)

Supplementary Table I. (Continued)

|                                                                                                                                                                                                                                                         | n  | Treatment schedule                                                                                                                          | Median tumor volume at staging (mm <sup>3</sup> ) |
|---------------------------------------------------------------------------------------------------------------------------------------------------------------------------------------------------------------------------------------------------------|----|---------------------------------------------------------------------------------------------------------------------------------------------|---------------------------------------------------|
|                                                                                                                                                                                                                                                         | 10 | Obinutuzumab (GA101) 1 mg/kg i.v., Days 27, 34                                                                                              | 269                                               |
|                                                                                                                                                                                                                                                         | 10 | Rituximab 1 mg/kg i.v., Days 27, 34                                                                                                         | 281                                               |
|                                                                                                                                                                                                                                                         | 10 | Chlorambucil 4 mg/kg i.p., Days 27, 28, 29                                                                                                  | 273                                               |
|                                                                                                                                                                                                                                                         | 10 | Obinutuzumab (GA101) 1 mg/kg i.v., Days 27, 34 + chlorambucil 4 mg/kg i.p., Days 27, 28, 29                                                 | 274                                               |
|                                                                                                                                                                                                                                                         | 10 | Rituximab 1 mg/kg i.v., Days 27, 34 + chlorambucil 4 mg/kg i.p., Days 27, 28, 29                                                            | 274                                               |
| Single-agent studies in WSU-DLCL2 xenograft<br>Single-agent obinutuzumab (GA101) or<br>cyclophosphamide/vincristine/doxorubicin<br>WSU-DLCL2 lymphoma xenograft<br>Treatment initiation 9 days post cell<br>transplantation<br>Study termination Day 30 | 10 | Vehicle                                                                                                                                     | 143                                               |
|                                                                                                                                                                                                                                                         | 10 | Cyclophosphamide 25 mg/kg plus vincristine 0.25 mg/kg i.v. q7d × 3                                                                          | 140                                               |
|                                                                                                                                                                                                                                                         | 10 | Doxorubicin 3 mg/kg i.v. q7d × 3                                                                                                            | 143                                               |
|                                                                                                                                                                                                                                                         | 10 | Cyclophosphamide 25 mg/kg plus vincristine 0.25 mg/kg i.v. q7d plus doxorubicin 3 mg/kg i.v. q7d × 3                                        | 140                                               |
|                                                                                                                                                                                                                                                         | 10 | Obinutuzumab (GA101) 30 mg/kg i.v. q7d × 3                                                                                                  | 143                                               |
|                                                                                                                                                                                                                                                         | 10 | Obinutuzumab (GA101) 100 mg/kg i.v. q7d × 3                                                                                                 | 144                                               |
| Combination studies in WSU-DLCL2 xenograft<br>Cyclophosphamide/vincristine combination<br>WSU-DLCL2 lymphoma xenograft<br>Treatment initiation 9 days post cell<br>transplantation<br>Study termination Day 35-64                                       | 10 | Vehicle                                                                                                                                     | 115                                               |
|                                                                                                                                                                                                                                                         | 10 | Rituximab 30 mg/kg i.v., Days 9, 15, 23, 30, 37, 44, 51, 58                                                                                 | 114                                               |
|                                                                                                                                                                                                                                                         | 10 | Obinutuzumab (GA101) 30 mg/kg i.v., Days 9, 15, 23, 30, 37, 44, 51, 58                                                                      | 114                                               |
|                                                                                                                                                                                                                                                         | 10 | CYC/VINC 25/0.25 mg/kg i.v., Days 9, 15, 23, 30, 37, 44, 51, 58                                                                             | 115                                               |
|                                                                                                                                                                                                                                                         | 10 | Obinutuzumab (GA101) 30 mg/kg i.v., + CYC/VINC 25/0.25 mg/kg i.v., Days 9, 15, 23, 30, 37, 44, 51, 58                                       | 112                                               |
|                                                                                                                                                                                                                                                         | 10 | Rituximab 30 mg/kg i.v., + CYC/VINC 25/0.25 mg/kg i.v., Days 9, 15, 23, 30, 37, 44, 51, 58                                                  | 112                                               |
|                                                                                                                                                                                                                                                         | 10 | CYC/VINC 25/0.25 mg/kg i.v., Days 9, 15, 23 then obinutuzumab (GA101) 30 mg/kg i.v., Days 30, 37, 44, 51, 58                                | 115                                               |
|                                                                                                                                                                                                                                                         | 10 | CYC/VINC 25/0.25 mg/kg i.v., Days 9, 15, 23 then rituximab 30 mg/kg i.v., Days 30, 37, 44, 51, 58                                           | 113                                               |
|                                                                                                                                                                                                                                                         | 10 | CYC/VINC 25/0.25 mg/kg i.v., Days 9, 15, 23 then CYC/VINC 25/0.25 mg/kg i.v., + obinutuzumab (GA101) 30 mg/kg i.v., Days 30, 37, 44, 51, 58 | 113                                               |
|                                                                                                                                                                                                                                                         | 10 | CYC/VINC 25/0.25 mg/kg i.v., Days 9, 15, 23 then CYC/VINC 25/0.25 mg/kg i.v., + rituximab 30 mg/kg i.v., Days 30, 37, 44, 51, 58            | 113                                               |

CYC, cyclophosphamide; i.p., intraperitoneal; i.v., intravenous; q7d, every 7 days; VINC, vincristine.
